# Supplementary material
Source: publisher site journal article supplement (https://www.dovepress.com/article/464176)
Supplement: Supplementary file 1 [file get_supplementary_file.php]

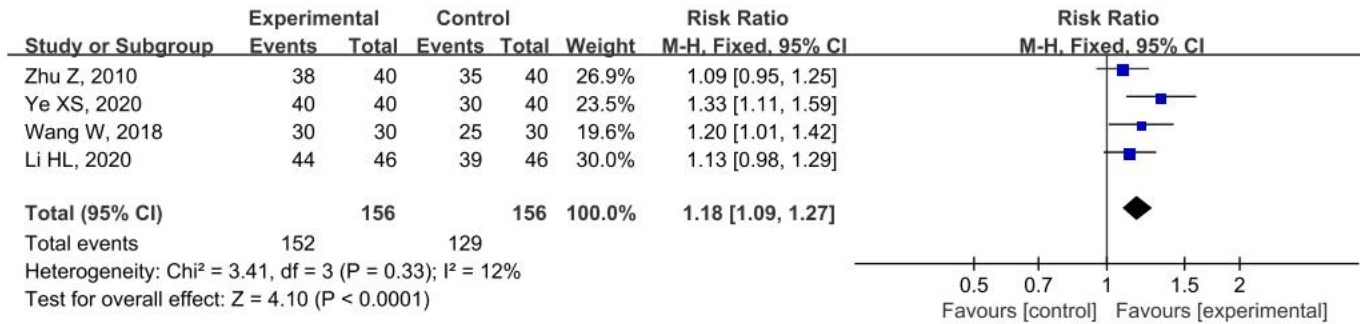

1

2 **Figure S1A** Effect of interventions in SN and CG on TER forest plot

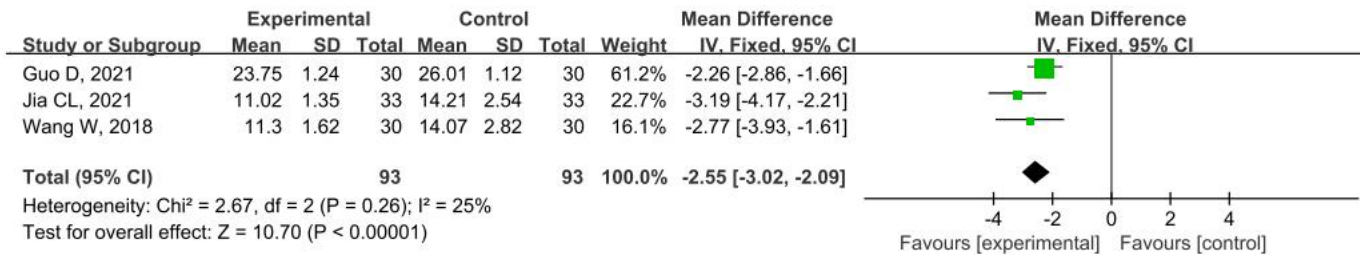

3

4 **Figure S1B** Effect of interventions in SN and CG on WHT forest plot

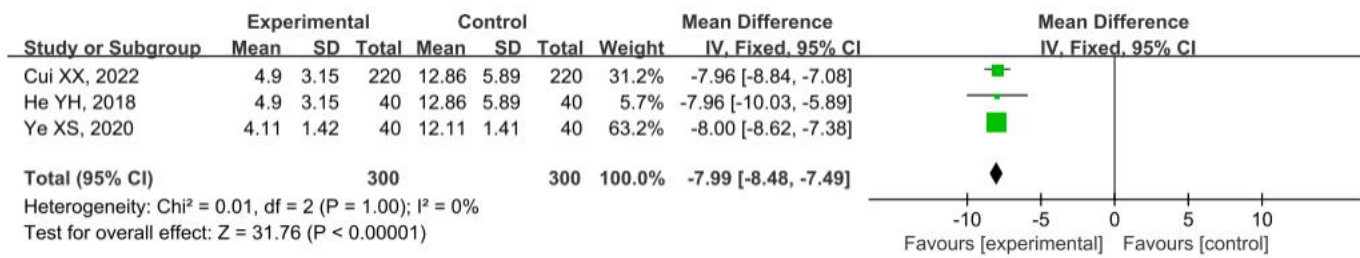

5

6 **Figure S1C** Effect of interventions in SN and CG on PRT forest plot

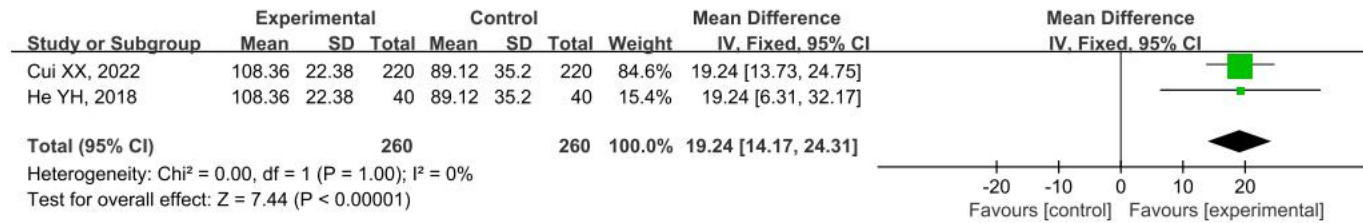

7

8 **Figure S1D** Effect of interventions in SN and CG on PDT forest plot

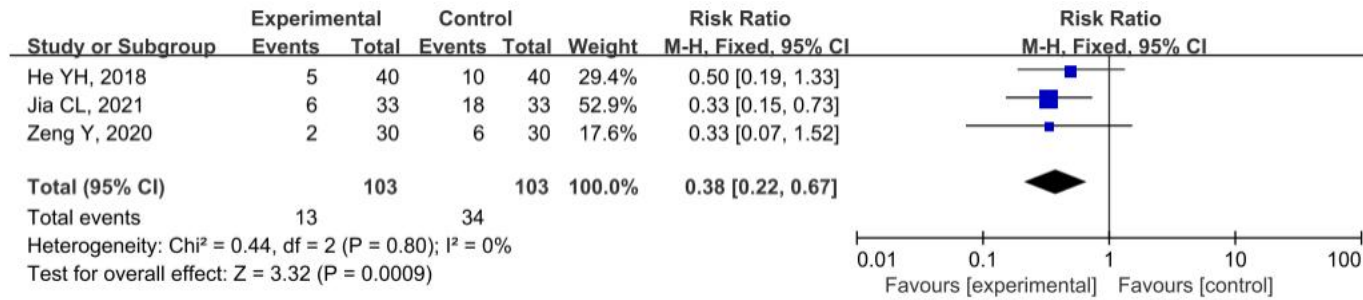

9

10 **Figure S1E** Effect of interventions in SN and CG on AEs forest plot

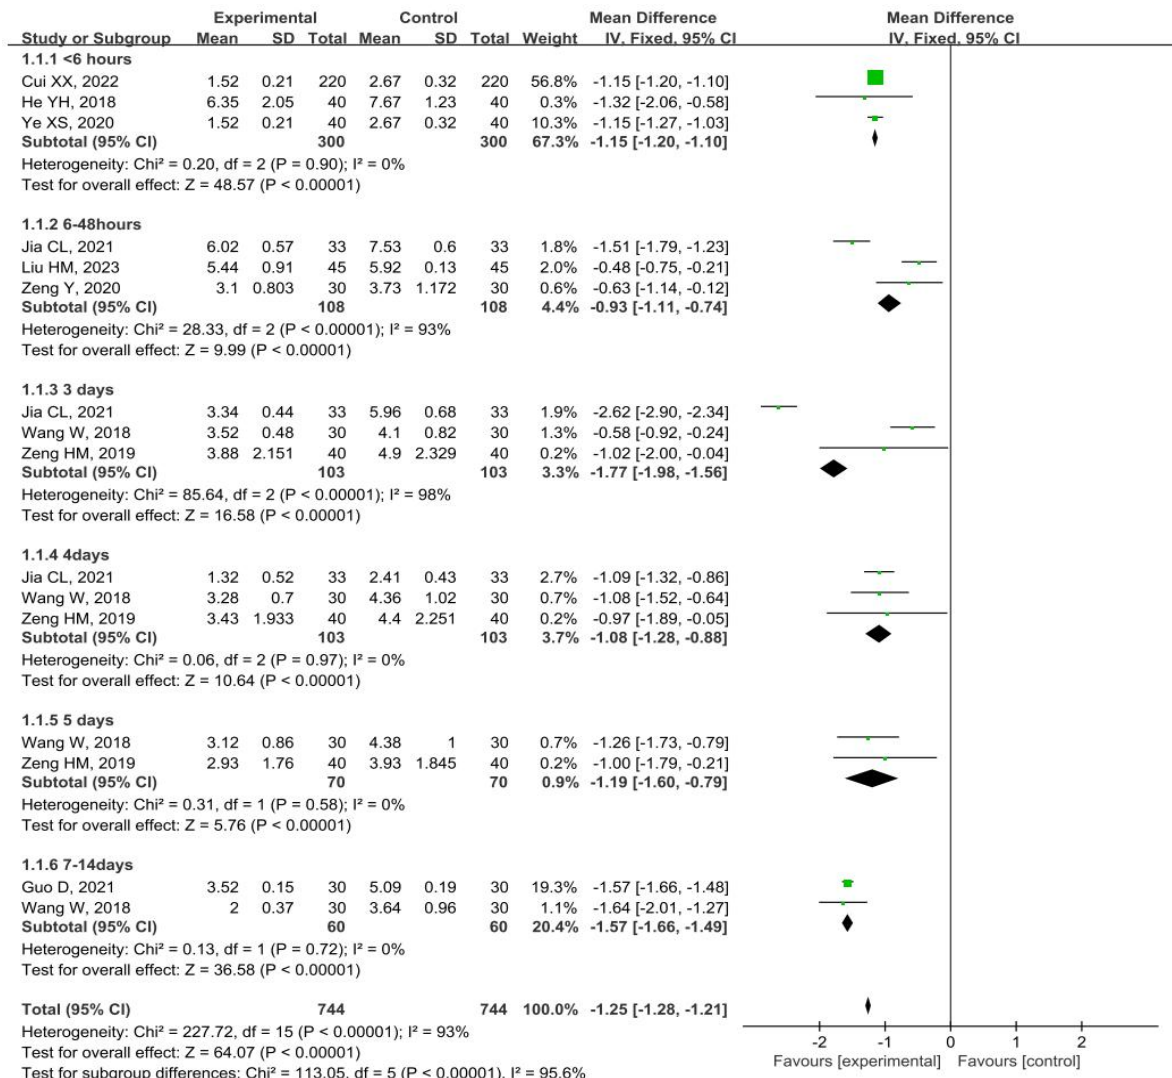

11

12 **Figure S2A** Subgroup analysis of VAS on different measurement times for CG

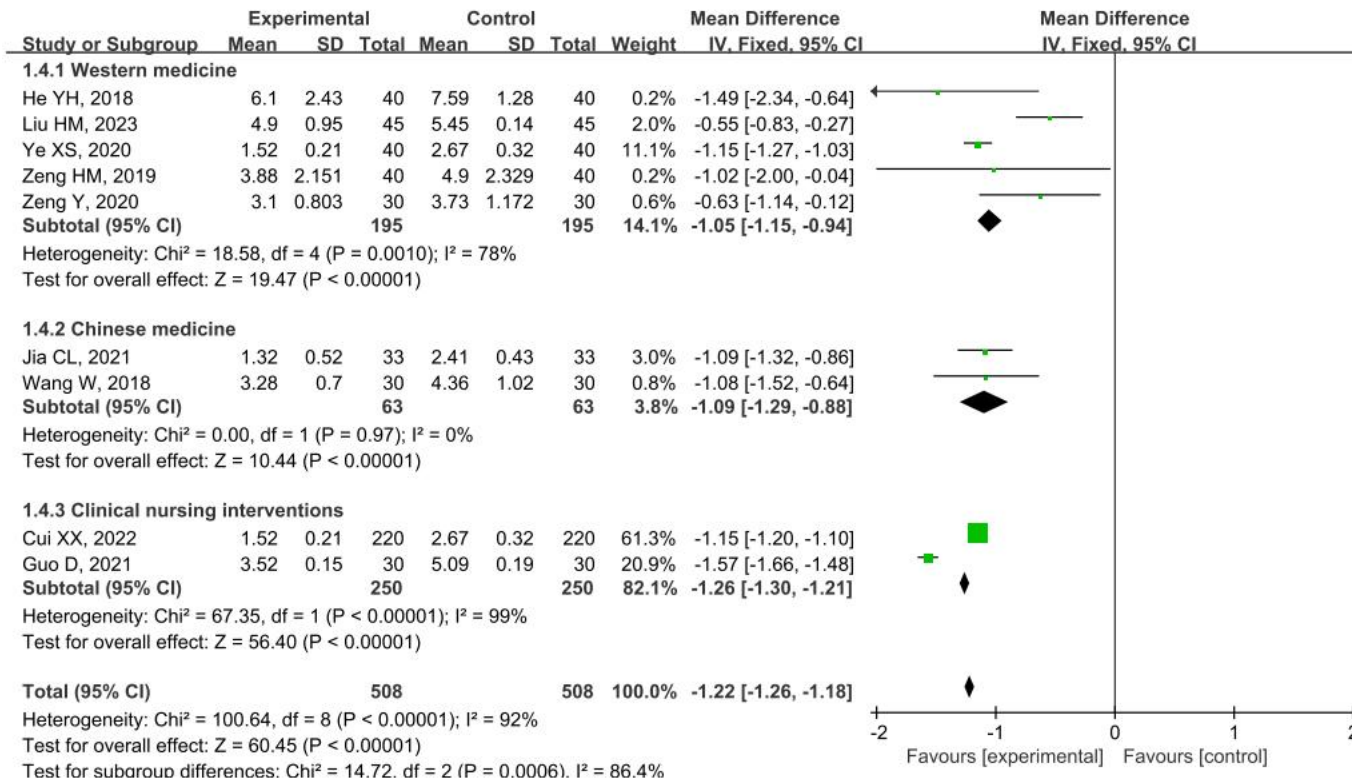

13

14 **Figure S2B** Subgroup analysis of VAS on different treatments for CG

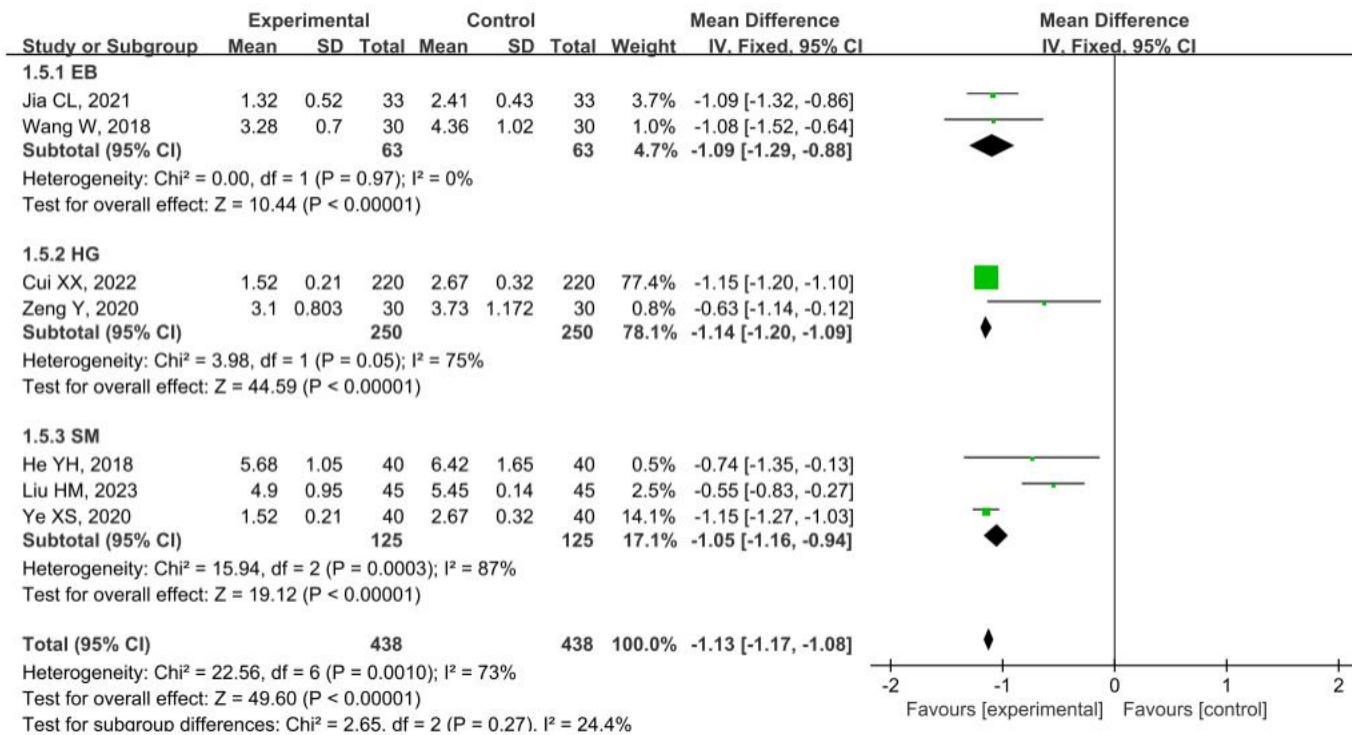

15

16 **Figure S2C** Subgroup analysis of VAS on different acupoints for CG

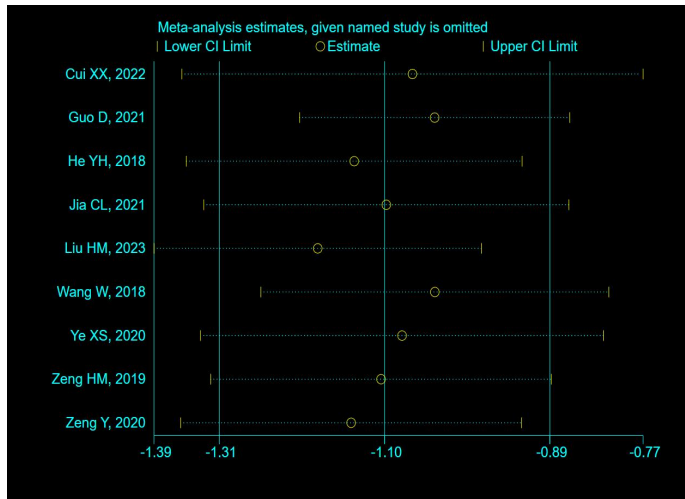

17

18 **Figure S3A** Statistical analyses of interventions in SN and CG on VAS

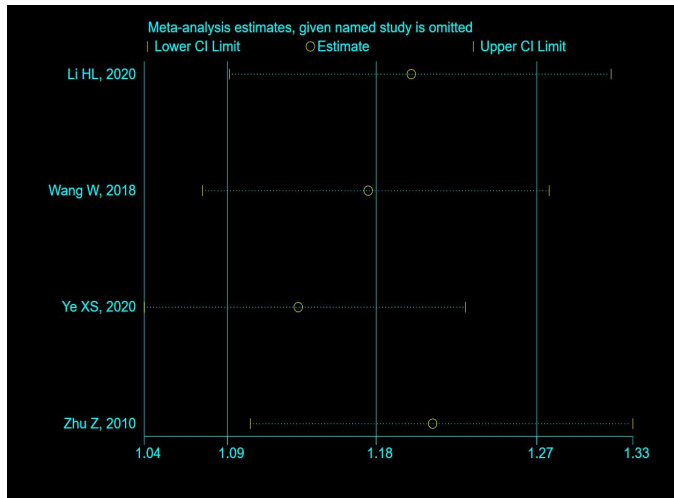

19

20 **Figure S3B** Statistical analyses of interventions in SN and CG on TER

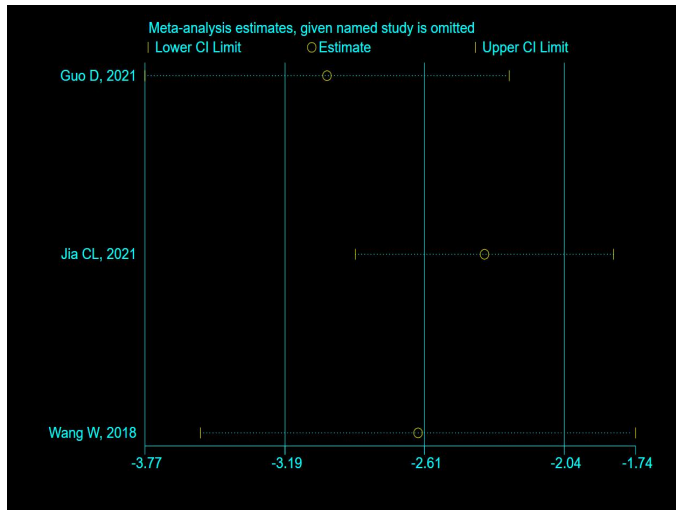

21

22 **Figure S3C** Statistical analyses of interventions in SN and CG on WHT

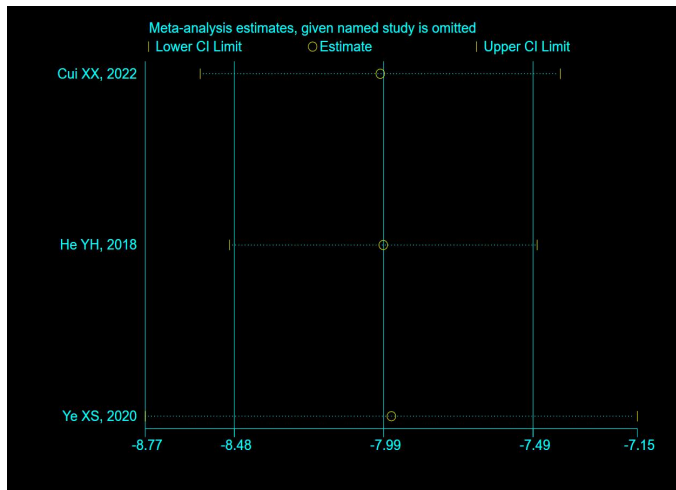

23

24 **Figure S3D** Statistical analyses of interventions in SN and CG on PRT

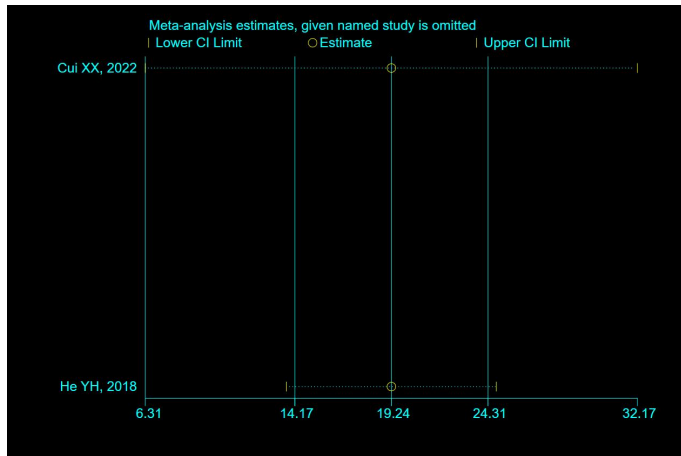

25

26 **Figure S3E** Statistical analyses of interventions in SN and CG on PDT

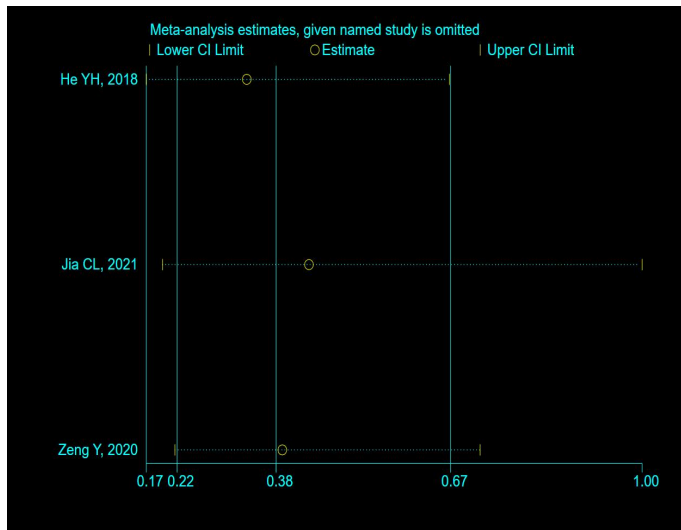

27

28 **Figure S3F** Statistical analyses of interventions in SN and CG on AEs



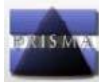

# PRISMA 2020 Checklist

| Section and Topic             | Item # | Checklist item                                                                                                                                                                                                                                                                                       | Location where item is reported |
|-------------------------------|--------|------------------------------------------------------------------------------------------------------------------------------------------------------------------------------------------------------------------------------------------------------------------------------------------------------|---------------------------------|
| <b>TITLE</b>                  |        |                                                                                                                                                                                                                                                                                                      |                                 |
| Title                         | 1      | Identify the report as a systematic review.                                                                                                                                                                                                                                                          | Page 1                          |
| <b>ABSTRACT</b>               |        |                                                                                                                                                                                                                                                                                                      |                                 |
| Abstract                      | 2      | See the PRISMA 2020 for Abstracts checklist.                                                                                                                                                                                                                                                         | Page 1-2                        |
| <b>INTRODUCTION</b>           |        |                                                                                                                                                                                                                                                                                                      |                                 |
| Rationale                     | 3      | Describe the rationale for the review in the context of existing knowledge.                                                                                                                                                                                                                          | Page 2-4                        |
| Objectives                    | 4      | Provide an explicit statement of the objective(s) or question(s) the review addresses.                                                                                                                                                                                                               | Page 4                          |
| <b>METHODS</b>                |        |                                                                                                                                                                                                                                                                                                      |                                 |
| Eligibility criteria          | 5      | Specify the inclusion and exclusion criteria for the review and how studies were grouped for the syntheses.                                                                                                                                                                                          | Page 5                          |
| Information sources           | 6      | Specify all databases, registers, websites, organisations, reference lists and other sources searched or consulted to identify studies. Specify the date when each source was last searched or consulted.                                                                                            | Page 4                          |
| Search strategy               | 7      | Present the full search strategies for all databases, registers and websites, including any filters and limits used.                                                                                                                                                                                 | Appendices                      |
| Selection process             | 8      | Specify the methods used to decide whether a study met the inclusion criteria of the review, including how many reviewers screened each record and each report retrieved, whether they worked independently, and if applicable, details of automation tools used in the process.                     | Page 5                          |
| Data collection process       | 9      | Specify the methods used to collect data from reports, including how many reviewers collected data from each report, whether they worked independently, any processes for obtaining or confirming data from study investigators, and if applicable, details of automation tools used in the process. | Page 5                          |
| Data items                    | 10a    | List and define all outcomes for which data were sought. Specify whether all results that were compatible with each outcome domain in each study were sought (e.g. for all measures, time points, analyses), and if not, the methods used to decide which results to collect.                        | Page 5                          |
|                               | 10b    | List and define all other variables for which data were sought (e.g. participant and intervention characteristics, funding sources). Describe any assumptions made about any missing or unclear information.                                                                                         | Page 5                          |
| Study risk of bias assessment | 11     | Specify the methods used to assess risk of bias in the included studies, including details of the tool(s) used, how many reviewers assessed each study and whether they worked independently, and if applicable, details of automation tools used in the process.                                    | Page 5-6                        |
| Effect measures               | 12     | Specify for each outcome the effect measure(s) (e.g. risk ratio, mean difference) used in the synthesis or presentation of results.                                                                                                                                                                  | Page 6                          |
| Synthesis methods             | 13a    | Describe the processes used to decide which studies were eligible for each synthesis (e.g. tabulating the study intervention characteristics and comparing against the planned groups for each synthesis (item #5)).                                                                                 | Page 19                         |
|                               | 13b    | Describe any methods required to prepare the data for presentation or synthesis, such as handling of missing summary statistics, or data conversions.                                                                                                                                                | Page 6                          |
|                               | 13c    | Describe any methods used to tabulate or visually display results of individual studies and syntheses.                                                                                                                                                                                               | Page 6                          |
|                               | 13d    | Describe any methods used to synthesize results and provide a rationale for the choice(s). If meta-analysis was performed, describe the model(s), method(s) to identify the presence and extent of statistical heterogeneity, and software package(s) used.                                          | Page 6                          |
|                               | 13e    | Describe any methods used to explore possible causes of heterogeneity among study results (e.g. subgroup analysis, meta-regression).                                                                                                                                                                 | Page 6                          |
|                               | 13f    | Describe any sensitivity analyses conducted to assess robustness of the synthesized results.                                                                                                                                                                                                         | Page 6                          |
| Reporting bias assessment     | 14     | Describe any methods used to assess risk of bias due to missing results in a synthesis (arising from reporting biases).                                                                                                                                                                              | Page 6                          |
| Certainty assessment          | 15     | Describe any methods used to assess certainty (or confidence) in the body of evidence for an outcome.                                                                                                                                                                                                | Page 6                          |

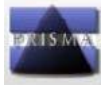

# PRISMA 2020 Checklist

| Section and Topic                              | Item # | Checklist item                                                                                                                                                                                                                                                                       | Location where item is reported |
|------------------------------------------------|--------|--------------------------------------------------------------------------------------------------------------------------------------------------------------------------------------------------------------------------------------------------------------------------------------|---------------------------------|
| <b>RESULTS</b>                                 |        |                                                                                                                                                                                                                                                                                      |                                 |
| Study selection                                | 16a    | Describe the results of the search and selection process, from the number of records identified in the search to the number of studies included in the review, ideally using a flow diagram.                                                                                         | Page 6-7                        |
|                                                | 16b    | Cite studies that might appear to meet the inclusion criteria, but which were excluded, and explain why they were excluded.                                                                                                                                                          | N/A                             |
| Study characteristics                          | 17     | Cite each included study and present its characteristics.                                                                                                                                                                                                                            | Page 7                          |
| Risk of bias in studies                        | 18     | Present assessments of risk of bias for each included study.                                                                                                                                                                                                                         | Page 7                          |
| Results of individual studies                  | 19     | For all outcomes, present, for each study: (a) summary statistics for each group (where appropriate) and (b) an effect estimate and its precision (e.g. confidence/credible interval), ideally using structured tables or plots.                                                     | Page 20-21                      |
| Results of syntheses                           | 20a    | For each synthesis, briefly summarise the characteristics and risk of bias among contributing studies.                                                                                                                                                                               | Page 8-9                        |
|                                                | 20b    | Present results of all statistical syntheses conducted. If meta-analysis was done, present for each the summary estimate and its precision (e.g. confidence/credible interval) and measures of statistical heterogeneity. If comparing groups, describe the direction of the effect. | Page 8-11                       |
|                                                | 20c    | Present results of all investigations of possible causes of heterogeneity among study results.                                                                                                                                                                                       | Page 9-10                       |
|                                                | 20d    | Present results of all sensitivity analyses conducted to assess the robustness of the synthesized results.                                                                                                                                                                           | Page 10-11                      |
| Reporting biases                               | 21     | Present assessments of risk of bias due to missing results (arising from reporting biases) for each synthesis assessed.                                                                                                                                                              | Page 8                          |
| Certainty of evidence                          | 22     | Present assessments of certainty (or confidence) in the body of evidence for each outcome assessed.                                                                                                                                                                                  | Page 11                         |
| <b>DISCUSSION</b>                              |        |                                                                                                                                                                                                                                                                                      |                                 |
| Discussion                                     | 23a    | Provide a general interpretation of the results in the context of other evidence.                                                                                                                                                                                                    | Page 11-13                      |
|                                                | 23b    | Discuss any limitations of the evidence included in the review.                                                                                                                                                                                                                      | Page 13                         |
|                                                | 23c    | Discuss any limitations of the review processes used.                                                                                                                                                                                                                                | Page 13                         |
|                                                | 23d    | Discuss implications of the results for practice, policy, and future research.                                                                                                                                                                                                       | Page 13                         |
| <b>OTHER INFORMATION</b>                       |        |                                                                                                                                                                                                                                                                                      |                                 |
| Registration and protocol                      | 24a    | Provide registration information for the review, including register name and registration number, or state that the review was not registered.                                                                                                                                       | Page 4                          |
|                                                | 24b    | Indicate where the review protocol can be accessed, or state that a protocol was not prepared.                                                                                                                                                                                       | Page 4                          |
|                                                | 24c    | Describe and explain any amendments to information provided at registration or in the protocol.                                                                                                                                                                                      | N/A                             |
| Support                                        | 25     | Describe sources of financial or non-financial support for the review, and the role of the funders or sponsors in the review.                                                                                                                                                        |                                 |
| Competing interests                            | 26     | Declare any competing interests of review authors.                                                                                                                                                                                                                                   | Page 13                         |
| Availability of data, code and other materials | 27     | Report which of the following are publicly available and where they can be found: template data collection forms; data extracted from included studies; data used for all analyses; analytic code; any other materials used in the review.                                           |                                 |

**Author(s):** Huang QQ

**Date:** 2023-08-28

**Question:** VAS for Postoperative hemorrhoid pain

**Settings:** SN vs CG

**Bibliography:** SN versus CG for Postoperative hemorrhoid pain. Cochrane Database of Systematic Reviews.

| Quality assessment                                                   |                   |                      |                                       |                         |                        |                      | No of patients |         | Effect            |                                    | Quality          | Importance |
|----------------------------------------------------------------------|-------------------|----------------------|---------------------------------------|-------------------------|------------------------|----------------------|----------------|---------|-------------------|------------------------------------|------------------|------------|
| No of studies                                                        | Design            | Risk of bias         | Inconsistency                         | Indirectness            | Imprecision            | Other considerations | VAS            | Control | Relative (95% CI) | Absolute                           |                  |            |
| <b>VAS (Better indicated by lower values)</b>                        |                   |                      |                                       |                         |                        |                      |                |         |                   |                                    |                  |            |
| 9                                                                    | randomised trials | serious <sup>1</sup> | no serious inconsistency <sup>2</sup> | no serious indirectness | no serious imprecision | none                 | 508            | 508     | -                 | MD 1.1 lower (1.31 to 0.89 lower)  | ⊕⊕⊕○<br>MODERATE | CRITICAL   |
| <b>measuring time (Better indicated by lower values)</b>             |                   |                      |                                       |                         |                        |                      |                |         |                   |                                    |                  |            |
| 9                                                                    | randomised trials | serious <sup>1</sup> | no serious inconsistency              | no serious indirectness | no serious imprecision | none                 | 744            | 744     | -                 | MD 1.25 lower (1.28 to 1.21 lower) | ⊕⊕⊕○<br>MODERATE | CRITICAL   |
| <b>measuring time - 0-6 hours (Better indicated by lower values)</b> |                   |                      |                                       |                         |                        |                      |                |         |                   |                                    |                  |            |
| 3                                                                    | randomised trials | serious <sup>1</sup> | no serious inconsistency              | no serious indirectness | no serious imprecision | none                 | 300            | 300     | -                 | MD 1.15 lower (1.2 to 1.1 lower)   | ⊕⊕⊕○<br>MODERATE | IMPORTANT  |
| <b>measuring time - 6-48hours (Better indicated by lower values)</b> |                   |                      |                                       |                         |                        |                      |                |         |                   |                                    |                  |            |
| 3                                                                    | randomised trials | serious <sup>1</sup> | serious <sup>3</sup>                  | no serious indirectness | serious <sup>4</sup>   | none                 | 108            | 108     | -                 | MD 0.93 lower (1.11 to 0.74 lower) | ⊕○○○<br>VERY LOW | IMPORTANT  |
| <b>measuring time - 3 days (Better indicated by lower values)</b>    |                   |                      |                                       |                         |                        |                      |                |         |                   |                                    |                  |            |
| 3                                                                    | randomised trials | serious <sup>1</sup> | no serious inconsistency              | no serious indirectness | serious <sup>4</sup>   | none                 | 103            | 103     | -                 | MD 1.77 lower (1.98 to 1.56 lower) | ⊕⊕○○<br>MODERATE | IMPORTANT  |

|                                                                                 |                   |                      |                            |                         |                        |      |     |     |   |                                    |                  |           |
|---------------------------------------------------------------------------------|-------------------|----------------------|----------------------------|-------------------------|------------------------|------|-----|-----|---|------------------------------------|------------------|-----------|
|                                                                                 | trials            |                      | inconsistency <sup>3</sup> | indirectness            |                        |      |     |     |   | 1.56 lower)                        | LOW              |           |
| <b>measuring time - 4days (Better indicated by lower values)</b>                |                   |                      |                            |                         |                        |      |     |     |   |                                    |                  |           |
| 3                                                                               | randomised trials | serious <sup>1</sup> | no serious inconsistency   | no serious indirectness | serious <sup>4</sup>   | none | 103 | 103 | - | MD 1.08 lower (1.28 to 0.88 lower) | ⊕⊕○○<br>LOW      | IMPORTANT |
| <b>measuring time - 5 days (Better indicated by lower values)</b>               |                   |                      |                            |                         |                        |      |     |     |   |                                    |                  |           |
| 2                                                                               | randomised trials | serious <sup>1</sup> | no serious inconsistency   | no serious indirectness | serious <sup>4</sup>   | none | 70  | 70  | - | MD 1.19 lower (1.6 to 0.79 lower)  | ⊕⊕○○<br>LOW      | IMPORTANT |
| <b>measuring time - 7-14days (Better indicated by lower values)</b>             |                   |                      |                            |                         |                        |      |     |     |   |                                    |                  |           |
| 2                                                                               | randomised trials | serious <sup>1</sup> | no serious inconsistency   | no serious indirectness | no serious imprecision | none | 60  | 60  | - | MD 1.57 lower (1.66 to 1.49 lower) | ⊕⊕⊕○<br>MODERATE | IMPORTANT |
| <b>Different treatment modalities for CG (Better indicated by lower values)</b> |                   |                      |                            |                         |                        |      |     |     |   |                                    |                  |           |
| 9                                                                               | randomised trials | serious <sup>1</sup> | serious <sup>3</sup>       | no serious indirectness | no serious imprecision | none | 508 | 508 | - | MD 1.22 lower (1.26 to 1.18 lower) | ⊕⊕○○<br>LOW      | IMPORTANT |
| <b>Western medical therapies (Better indicated by lower values)</b>             |                   |                      |                            |                         |                        |      |     |     |   |                                    |                  |           |
| 5                                                                               | randomised trials | serious <sup>1</sup> | serious <sup>3</sup>       | no serious indirectness | no serious imprecision | none | 195 | 195 | - | MD 1.05 lower (1.15 to 0.94 lower) | ⊕⊕○○<br>LOW      | IMPORTANT |
| <b>Chinese medical therapies (Better indicated by lower values)</b>             |                   |                      |                            |                         |                        |      |     |     |   |                                    |                  |           |
| 2                                                                               | randomised trials | serious <sup>1</sup> | no serious inconsistency   | no serious indirectness | serious <sup>4</sup>   | none | 63  | 63  | - | MD 1.09 lower (1.29 to 0.88 lower) | ⊕⊕○○<br>LOW      | IMPORTANT |
| <b>Nursing routine interventions (Better indicated by lower values)</b>         |                   |                      |                            |                         |                        |      |     |     |   |                                    |                  |           |
| 2                                                                               | randomised trials | serious <sup>1</sup> | serious <sup>3</sup>       | no serious indirectness | no serious imprecision | none | 250 | 250 | - | MD 1.26 lower (1.3 to 1.21 lower)  | ⊕⊕○○<br>LOW      | IMPORTANT |
| <b>acupuncture point (Better indicated by lower values)</b>                     |                   |                      |                            |                         |                        |      |     |     |   |                                    |                  |           |
| 7                                                                               | randomised trials | serious <sup>1</sup> | serious <sup>3</sup>       | no serious indirectness | no serious imprecision | none | 438 | 438 | - | MD 1.13 lower (1.17 to 1.09 lower) | ⊕⊕○○<br>LOW      | IMPORTANT |

|                                                                  |                   |                      |                          |                         |                        |      |     |     |   |                                    |             |           |
|------------------------------------------------------------------|-------------------|----------------------|--------------------------|-------------------------|------------------------|------|-----|-----|---|------------------------------------|-------------|-----------|
|                                                                  | trials            |                      |                          | indirectness            | imprecision            |      |     |     |   | 1.08 lower)                        | LOW         |           |
| <b>acupuncture point - EB (Better indicated by lower values)</b> |                   |                      |                          |                         |                        |      |     |     |   |                                    |             |           |
| 2                                                                | randomised trials | serious <sup>1</sup> | no serious inconsistency | no serious indirectness | serious <sup>4</sup>   | none | 63  | 63  | - | MD 1.09 lower (1.29 to 0.88 lower) | ⊕⊕○○<br>LOW | IMPORTANT |
| <b>acupuncture point - HG (Better indicated by lower values)</b> |                   |                      |                          |                         |                        |      |     |     |   |                                    |             |           |
| 2                                                                | randomised trials | serious <sup>1</sup> | serious <sup>3</sup>     | no serious indirectness | no serious imprecision | none | 250 | 250 | - | MD 1.14 lower (1.2 to 1.09 lower)  | ⊕⊕○○<br>LOW | IMPORTANT |
| <b>acupuncture point - SM (Better indicated by lower values)</b> |                   |                      |                          |                         |                        |      |     |     |   |                                    |             |           |
| 3                                                                | randomised trials | serious <sup>2</sup> | serious <sup>3</sup>     | no serious indirectness | no serious imprecision | none | 125 | 125 | - | MD 1.05 lower (1.16 to 0.94 lower) | ⊕⊕○○<br>LOW | IMPORTANT |

<sup>1</sup> Lack of clarity in allocation concealment

<sup>2</sup> Heterogeneity is large, but can be explained

<sup>3</sup> High heterogeneity and unexplained

<sup>4</sup> Small sample size, large confidence intervals

**Author(s):** Huang QQ

**Date:** 2023-08-28

**Question:** WHT for Postoperative hemorrhoid pain

**Settings:** SN vs CG

**Bibliography:** SN versus CG for Postoperative hemorrhoid pain. Cochrane Database of Systematic Reviews .

| Quality assessment |        |              |               |              |             |                      | No of patients |         | Effect            |          | Quality | Importance |
|--------------------|--------|--------------|---------------|--------------|-------------|----------------------|----------------|---------|-------------------|----------|---------|------------|
| No of studies      | Design | Risk of bias | Inconsistency | Indirectness | Imprecision | Other considerations | WHT            | Control | Relative (95% CI) | Absolute |         |            |

| WHT (Better indicated by lower values) |                   |                      |                          |                         |                      |      |    |    |   |                                    |             |           |
|----------------------------------------|-------------------|----------------------|--------------------------|-------------------------|----------------------|------|----|----|---|------------------------------------|-------------|-----------|
| 3                                      | randomised trials | serious <sup>1</sup> | no serious inconsistency | no serious indirectness | serious <sup>2</sup> | none | 93 | 93 | - | MD 2.55 lower (3.02 to 2.09 lower) | ⊕⊕○○<br>LOW | IMPORTANT |

<sup>1</sup> Blindness and allocation hide ambiguity

<sup>2</sup> Small sample size, large confidence intervals

**Author(s):** Huang QQ

**Date:** 2023-08-28

**Question:** TER for Postoperative hemorrhoid pain

**Settings:** SN vs CG

**Bibliography:** SN versus CG for Postoperative hemorrhoid pain. Cochrane Database of Systematic Reviews [Year], Issue [Issue].

| Quality assessment |                   |              |                          |                         |                        |                      | No of patients     |                    | Effect                 |                                              | Quality          | Importance |
|--------------------|-------------------|--------------|--------------------------|-------------------------|------------------------|----------------------|--------------------|--------------------|------------------------|----------------------------------------------|------------------|------------|
| No of studies      | Design            | Risk of bias | Inconsistency            | Indirectness            | Imprecision            | Other considerations | TER                | Control            | Relative (95% CI)      | Absolute                                     |                  |            |
| TER                |                   |              |                          |                         |                        |                      |                    |                    |                        |                                              |                  |            |
| 4                  | randomised trials | serious      | no serious inconsistency | no serious indirectness | no serious imprecision | none                 | 152/156<br>(97.4%) | 129/156<br>(82.7%) | RR 1.18 (1.09 to 1.27) | 149 more per 1000 (from 74 more to 223 more) | ⊕⊕⊕○<br>MODERATE | IMPORTANT  |
|                    |                   |              |                          |                         |                        |                      |                    | 84.1%              |                        | 151 more per 1000 (from 76 more to 227 more) |                  |            |

**Author(s):** Huang QQ

**Date:** 2023-08-28

**Question:** Should AEs be used for Postoperative hemorrhoid pain?

**Settings:** SN vs CG

**Bibliography:** SN versus CG for Postoperative hemorrhoid pain. Cochrane Database of Systematic Reviews.

| Quality assessment |                   |              |                          |                         |                      |                      | No of patients |              | Effect                 |                                                  | Quality     | Importance |
|--------------------|-------------------|--------------|--------------------------|-------------------------|----------------------|----------------------|----------------|--------------|------------------------|--------------------------------------------------|-------------|------------|
| No of studies      | Design            | Risk of bias | Inconsistency            | Indirectness            | Imprecision          | Other considerations | AEs            | Control      | Relative (95% CI)      | Absolute                                         |             |            |
| <b>AEs</b>         |                   |              |                          |                         |                      |                      |                |              |                        |                                                  |             |            |
| 3                  | randomised trials | serious      | no serious inconsistency | no serious indirectness | serious <sup>1</sup> | none                 | 13/103 (12.6%) | 34/103 (33%) | RR 0.38 (0.22 to 0.67) | 205 fewer per 1000 (from 109 fewer to 257 fewer) | ⊕⊕○○<br>LOW | IMPORTANT  |
|                    |                   |              |                          |                         |                      |                      |                | 25%          |                        | 155 fewer per 1000 (from 82 fewer to 195 fewer)  |             |            |

<sup>1</sup> Small sample size, large confidence intervals

**Author(s):** Huang QQ

**Date:** 2023-08-28

**Question:** Should PRT be used for Postoperative hemorrhoid pain?

**Settings:** SN vs CG

**Bibliography:** SN versus CG for Postoperative hemorrhoid pain. Cochrane Database of Systematic Reviews.

| Quality assessment                            |                   |                      |                          |                         |                        |                      | No of patients |         | Effect            |                                    | Quality          | Importance |
|-----------------------------------------------|-------------------|----------------------|--------------------------|-------------------------|------------------------|----------------------|----------------|---------|-------------------|------------------------------------|------------------|------------|
| No of studies                                 | Design            | Risk of bias         | Inconsistency            | Indirectness            | Imprecision            | Other considerations | PRT            | Control | Relative (95% CI) | Absolute                           |                  |            |
| <b>PRT (Better indicated by lower values)</b> |                   |                      |                          |                         |                        |                      |                |         |                   |                                    |                  |            |
| 3                                             | randomised trials | serious <sup>1</sup> | no serious inconsistency | no serious indirectness | no serious imprecision | none                 | 300            | 300     | -                 | MD 7.99 lower (8.48 to 7.49 lower) | ⊕⊕⊕○<br>MODERATE | IMPORTANT  |

<sup>1</sup> Blindness and allocation hide ambiguity

**Author(s):** Huang QQ

**Date:** 2023-08-28

**Question:** Should PDT be used for Postoperative hemorrhoid pain?

**Settings:** SN vs CG

**Bibliography:** SN versus CG for Postoperative hemorrhoid pain. Cochrane Database of Systematic Reviews.

| Quality assessment                     |                   |                      |                          |                         |                      |                      | No of patients |         | Effect            |                                     | Quality     | Importance |
|----------------------------------------|-------------------|----------------------|--------------------------|-------------------------|----------------------|----------------------|----------------|---------|-------------------|-------------------------------------|-------------|------------|
| No of studies                          | Design            | Risk of bias         | Inconsistency            | Indirectness            | Imprecision          | Other considerations | PDT            | Control | Relative (95% CI) | Absolute                            |             |            |
| PDT (Better indicated by lower values) |                   |                      |                          |                         |                      |                      |                |         |                   |                                     |             |            |
| 2                                      | randomised trials | serious <sup>1</sup> | no serious inconsistency | no serious indirectness | serious <sup>2</sup> | none                 | 260            | 260     | -                 | MD 0 higher (14.17 to 24.31 higher) | ⊕⊕○○<br>LOW | IMPORTANT  |

<sup>1</sup> Blindness and allocation hide ambiguity

<sup>2</sup> Small sample size, large confidence intervals





Pain, Chronic[Title/Abstract])) OR (Pain, Chronic Post-operative[Title/Abstract])) OR (Post operative Pain, Chronic[Title/Abstract])) OR (Chronic Post-operative Pain[Title/Abstract])) OR (Chronic Post operative Pain[Title/Abstract])) OR (Postoperative Pain, Acute[Title/Abstract])) OR (Pain, Acute Postoperative[Title/Abstract])) OR (Acute Postoperative Pain[Title/Abstract])) OR (Acute Post-operative Pain[Title/Abstract])) OR (Acute Post operative Pain[Title/Abstract])) OR (Post-operative Pain, Acute[Title/Abstract])) OR (Pain, Acute Post-operative[Title/Abstract])) OR (Post operative Pain, Acute[Title/Abstract])) AND (("Hemorrhoids"[Mesh]) OR (((external hemorrhoid[Title/Abstract]) OR (internal hemorrhoid[Title/Abstract])) OR (mixed hemorrhoids[Title/Abstract]))) AND (("Acupuncture, Ear"[Mesh]) OR (((((((((((((((snap button[Title/Abstract]) OR (press needle[Title/Abstract])) OR (bell peg[Title/Abstract])) OR (ear pin[Title/Abstract])) OR (Ear acupuncture[Title/Abstract])) OR (Acupunctures, Ear[Title/Abstract])) OR (Ear Acupunctures[Title/Abstract])) OR (Auricular Acupuncture[Title/Abstract])) OR (Acupuncture, Auricular[Title/Abstract])) OR (Acupunctures, Auricular[Title/Abstract])) OR (Auricular Acupunctures[Title/Abstract])) OR (hypodermic needle[Title/Abstract])) OR (intradermal needle[Title/Abstract])) OR

(countersunk (of needle[Title/Abstract])) OR  
 (Acupuncture[Title/Abstract])) AND (("randomized controlled  
 trial"[Publication Type] OR "randomized"[Title/Abstract] OR  
 "placebo"[Title/Abstract] OR "RCTs"[Title/Abstract]))

## EMBASE

Embase session results (16 Aug 2023)

| No. | Query                      | Results |
|-----|----------------------------|---------|
| #13 | #9 AND #10 AND #11 AND #12 | 7       |
| #12 | #4 OR #8                   | 1430831 |
| #11 | #3 OR #5                   | 101503  |
| #10 | #2 OR #6                   | 40412   |
| #9  | #1 OR #7                   | 12941   |

| No. | Query                                                                                                                                                                                                                                                                                                                                                                                                                                                                                                                                  | Results |
|-----|----------------------------------------------------------------------------------------------------------------------------------------------------------------------------------------------------------------------------------------------------------------------------------------------------------------------------------------------------------------------------------------------------------------------------------------------------------------------------------------------------------------------------------------|---------|
| #8  | randomized:ti,ab,kw OR placebo:ti,ab,kw OR rcts:ti,ab,kw<br>OR 'controlled trial, randomized':ti,ab,kw OR 'randomised<br>controlled study':ti,ab,kw OR 'randomised controlled<br>trial':ti,ab,kw OR 'randomized controlled study':ti,ab,kw OR<br>'trial, randomized controlled':ti,ab,kw OR 'randomized<br>controlled trial':ti,ab,kw                                                                                                                                                                                                  | 1197110 |
| #7  | 'anus haemorrhoid':ti,ab,kw OR 'haemorrhoid':ti,ab,kw OR<br>'hemorrhoid syndrome':ti,ab,kw OR 'hemorrhoids':ti,ab,kw<br>OR 'internal hemorrhoid':ti,ab,kw OR 'external<br>hemorrhoid':ti,ab,kw OR 'mixed hemorrhoids':ti,ab,kw                                                                                                                                                                                                                                                                                                         | 6128    |
| #6  | 'snap button':ti,ab,kw OR 'press needle':ti,ab,kw OR 'bell<br>peg':ti,ab,kw OR 'ear pin':ti,ab,kw OR 'acupunctures,<br>ear':ti,ab,kw OR 'ear acupunctures':ti,ab,kw OR 'auricular<br>acupuncture':ti,ab,kw OR 'acupuncture, auricular':ti,ab,kw<br>OR 'acupunctures, auricular':ti,ab,kw OR 'auricular<br>acupunctures':ti,ab,kw OR 'hypodermic needle':ti,ab,kw OR<br>'intra dermal needle':ti,ab,kw OR (countersunk:ti,ab,kw AND<br>'of needle':ti,ab,kw) OR acupuncture:ti,ab,kw OR<br>'acupuncture, ear':ti,ab,kw OR 'acupuncture, | 40255   |

| No. | Query                                                                                                                                                                                                                                                                                                                                                                                                                                                                                                                                                                                                                                                                                                                                                                                                                                                                         | Results |
|-----|-------------------------------------------------------------------------------------------------------------------------------------------------------------------------------------------------------------------------------------------------------------------------------------------------------------------------------------------------------------------------------------------------------------------------------------------------------------------------------------------------------------------------------------------------------------------------------------------------------------------------------------------------------------------------------------------------------------------------------------------------------------------------------------------------------------------------------------------------------------------------------|---------|
|     | earlobe':ti,ab,kw OR 'auriculo-acupuncture':ti,ab,kw OR<br>'auriculoacupuncture':ti,ab,kw OR 'auriculotherapy':ti,ab,kw<br>OR 'ear acupuncture':ti,ab,kw OR 'earlobe<br>acupuncture':ti,ab,kw                                                                                                                                                                                                                                                                                                                                                                                                                                                                                                                                                                                                                                                                                 |         |
| #5  | 'post-surgical pain':ti,ab,kw OR 'pain, post-surgical':ti,ab,kw<br>OR 'post surgical pain':ti,ab,kw OR 'pain,<br>post-operative':ti,ab,kw OR 'pain, post operative':ti,ab,kw<br>OR 'postsurgical pain':ti,ab,kw OR 'pain,<br>postsurgical':ti,ab,kw OR 'post-operative pain':ti,ab,kw OR<br>'post operative pain':ti,ab,kw OR 'post-operative<br>pains':ti,ab,kw OR 'postoperative pain':ti,ab,kw OR<br>'postoperative pain, chronic':ti,ab,kw OR 'pain, chronic<br>postoperative':ti,ab,kw OR 'chronic postoperative<br>pain':ti,ab,kw OR 'chronic post-surgical pain':ti,ab,kw OR<br>'chronic post surgical pain':ti,ab,kw OR 'pain, chronic<br>post-surgical':ti,ab,kw OR 'chronic postsurgical<br>pains':ti,ab,kw OR 'pain, chronic postsurgical':ti,ab,kw OR<br>'post-surgical pain, chronic':ti,ab,kw OR 'chronic<br>postsurgical pain':ti,ab,kw OR 'postsurgical pain, | 55274   |

| No. | Query                                                                                                                                                                                                                                                                                                                                                                                                                                                                                                                                                                                                                                                                                                                                        | Results |
|-----|----------------------------------------------------------------------------------------------------------------------------------------------------------------------------------------------------------------------------------------------------------------------------------------------------------------------------------------------------------------------------------------------------------------------------------------------------------------------------------------------------------------------------------------------------------------------------------------------------------------------------------------------------------------------------------------------------------------------------------------------|---------|
|     | chronic':ti,ab,kw OR 'persistent postsurgical pain':ti,ab,kw<br>OR 'pain, persistent postsurgical':ti,ab,kw OR 'postsurgical<br>pain, persistent':ti,ab,kw OR 'post-operative pain,<br>chronic':ti,ab,kw OR 'pain, chronic post-operative':ti,ab,kw<br>OR 'post operative pain, chronic':ti,ab,kw OR 'chronic<br>post-operative pain':ti,ab,kw OR 'chronic post operative<br>pain':ti,ab,kw OR 'postoperative pain, acute':ti,ab,kw OR<br>'pain, acute postoperative':ti,ab,kw OR 'acute postoperative<br>pain':ti,ab,kw OR 'acute post-operative pain':ti,ab,kw OR<br>'acute post operative pain':ti,ab,kw OR 'post-operative pain,<br>acute':ti,ab,kw OR 'pain, acute post-operative':ti,ab,kw OR<br>'post operative pain, acute':ti,ab,kw |         |
| #4  | 'randomized controlled trial'/exp                                                                                                                                                                                                                                                                                                                                                                                                                                                                                                                                                                                                                                                                                                            | 781066  |
| #3  | 'postoperative pain'/exp                                                                                                                                                                                                                                                                                                                                                                                                                                                                                                                                                                                                                                                                                                                     | 89203   |
| #2  | 'auricular acupuncture'/exp                                                                                                                                                                                                                                                                                                                                                                                                                                                                                                                                                                                                                                                                                                                  | 806     |
| #1  | 'hemorrhoid'/exp                                                                                                                                                                                                                                                                                                                                                                                                                                                                                                                                                                                                                                                                                                                             | 11952   |

## Web of Science

TS= ("Pain, Postoperative" OR "Post-surgical Pain" OR "Pain, Post-surgical" OR "Post surgical Pain" OR "Pain, Post-operative" OR "Pain, Post operative" OR "Postsurgical Pain" OR "Pain, Postsurgical" OR "Post-operative Pain" OR "Post operative Pain" OR "Post-operative Pains" OR "Postoperative Pain" OR "Postoperative Pain, Chronic" OR "Pain, Chronic Postoperative" OR "Chronic Postoperative Pain" OR "Chronic Post-surgical Pain" OR "Chronic Post surgical Pain" OR "Pain, Chronic Post-surgical" OR "Post-surgical Pain, Chronic" OR "Chronic Postsurgical Pain" OR "Chronic Postsurgical Pains" OR "Pain, Chronic Postsurgical" OR "Postsurgical Pain, Chronic" OR "Persistent Postsurgical Pain" OR "Pain, Persistent Postsurgical" OR "Postsurgical Pain, Persistent" OR "Post-operative Pain, Chronic" OR "Pain, Chronic Post-operative" OR "Post operative Pain, Chronic" OR "Chronic Post-operative Pain" OR "Chronic Post operative Pain" OR "Postoperative Pain, Acute" OR "Pain, Acute Postoperative" OR "Acute Postoperative Pain" OR "Acute Post-operative Pain" OR "Acute Post operative Pain" OR "Post-operative Pain, Acute" OR "Pain, Acute Post-operative" OR "Post operative Pain, Acute") AND TS=("Hemorrhoids" OR "external hemorrhoid" OR "internal hemorrhoid" OR "mixed hemorrhoids" OR "anus haemorrhoid" OR

"haemorrhoid" OR "hemorrhoid syndrome" OR "hemorrhoid") AND TS= ("Acupuncture, Ear" OR "snap button" OR "press needle" OR "bell peg" OR "ear pin" OR "Ear acupuncture" OR "Acupunctures, Ear" OR "Ear Acupunctures" OR "Auricular Acupuncture" OR "Acupuncture, Auricular" OR "Acupunctures, Auricular" OR "Auricular Acupunctures" OR "hypodermic needle" OR "intra dermal needle" OR "countersunk of needle" OR "Acupuncture") AND TS=("randomized controlled trial" OR "randomized" OR "placebo" OR "RCTs" )

## CBM

| 序号  | 检索表达式                                                                             | 命中文献数 |
|-----|-----------------------------------------------------------------------------------|-------|
| 16) | "痔疮"[常用字段:智能] OR "混合痔"[常用字段:智能] OR "内痔"[常用字段:智能] OR "外痔"[常用字段:智能] OR "痔"[常用字段:智能] | 27511 |
| 17) | "痔"[不加权:扩展]                                                                       | 21769 |
| 18) | "揸针"[常用字段:智能] OR "皮内针"[常用字段:智能] OR "耳针"[常用字段:智能] OR "埋针"[常用字段:智能]                 | 7367  |
| 19) | "皮内针疗法"[不加权:扩展]                                                                   | 130   |
| 20) | "疼痛, 手术后"[不加权:扩展]                                                                 | 20909 |
| 21) | "手术后疼痛"[常用字段:智能] OR "术后疼痛"[常用字段:智能]                                               |       |



|                                                                                                               |         |
|---------------------------------------------------------------------------------------------------------------|---------|
| OR "术后镇痛"[常用字段:智能]                                                                                            | 69304   |
| 22) "随机化"[常用字段:智能] OR "随机"[常用字段:智能] OR "随机分配"[常用字段:智能] OR "随机分组"[常用字段:智能] OR "抽签"[常用字段:智能] OR "随机试验"[常用字段:智能] | 1903943 |
| 23) (((("随机对照试验"[不加权:扩展]) OR "随机分配"[不加权:扩展]) OR "随机对照试验(主题)"[不加权:扩展]) OR "随机过程"[不加权:扩展])                      | 238208  |
| 24) ((#16) OR (#17))                                                                                          | 27511   |
| 25) ((#18) OR (#19))                                                                                          | 7367    |
| 26) ((#20) OR (#21))                                                                                          | 69304   |
| 27) ((#23) OR (#22))                                                                                          | 1904644 |
| 28) (((#24) AND (#25))) AND (#26)                                                                             | 57      |
| 29) (#28) AND (#27)                                                                                           | 42      |

## Wanfang

主题:(痔疮 OR 混合痔 OR 痔 OR 内痔 OR 外痔) and 题名或关键词:(术后疼痛 OR 手术后疼痛 ) and 主题:(揸针 OR 皮内针 OR 埋针 OR 耳针) and 摘要:(随机 OR 随机配对 OR 随机分组 OR 随机化 OR 随机过程 OR 抽签法 OR 随机试验)

## VIP

(((((题名或关键词=揸针 OR 题名或关键词=耳针) OR 题名或关键词=皮内针) OR 题名或关键词=埋针) AND ((((((摘要=随机对照 OR 摘要=随机分组) OR 摘要=随机) OR 摘要=rct) OR 摘要=RCT) OR 摘要=随机化) OR 摘要=抽签) OR 摘要=随机过程)) AND ((((((题名或关键词=痔疮 OR 题名或关键词=haemorrhoid) OR 题名或关键词=haemorrhoids) OR 题名或关键词=hemorrhoids) OR 题名或关键词=痔核) OR 题名或关键词=混合痔) OR 题名或关键词=痔) OR 题名或关键词=外痔) OR 题名或关键词=内痔)) AND ((题名或关键词=手术后疼痛 OR 题名或关键词=手术后并发症) OR 题名或关键词=术后疼痛))

## CNKI

(主题：揸针 + 方便揸针 + 耳穴揸针 + 清铃揸针 + 穴位揸针 + 督脉揸针 + 皮内针 + 埋针 + 耳针(精确)) AND (主题：痔疮 + 环状混合痔 + 混合痔 + 内痔 + 炎性痔疮 + 外痔 + 痔(精确)) AND (篇关摘：术后疼痛 + 手术后疼痛 + 术后(精确)) AND (全文：随机试验 + 随机 + 随机化 + 随机分组 + 随机分配 + 抽签(精确))
